# Supplementary material for: Effect of Ultrasonic Vibration on Microstructure and Antifouling Capability of Cu-Modified TiO2 Coating Produced by Micro-Arc Oxidation
Source: MDPI journal article supplement (doi:10.3390/coatings14040376), 2024-03-22
Supplement: s1 [file s1]

# Supplementary Materials: Effect of Ultrasonic Vibration on Microstructure and Antifouling Capability of Cu-Modified TiO<sub>2</sub> Coating Produced by Micro-Arc Oxidation

Pengfei Hu <sup>1,†</sup>, Liyang Zhu <sup>1,2,†</sup>, Jiejun Liu <sup>3</sup>, You Lv <sup>2</sup>, Guangyi Cai <sup>1,\*</sup> and Xinxin Zhang <sup>2,\*</sup>

<sup>1</sup> National Key Laboratory of Electromagnetic Energy, Naval University of Engineering, Wuhan 430033, China; huhongyi-fei@163.com (P.H.); zly17854173007@163.com (L.Z.)

<sup>2</sup> Key Laboratory of Material Chemistry for Energy Conversion and Storage, Hubei Key Laboratory of Material Chemistry and Service Failure, School of Chemistry and Chemical Engineering, Huazhong University of Science and Technology, Ministry of Education, 1037 Luoyu Road, Hongshan District, Wuhan 430074, China; lvyou0819@163.com

<sup>3</sup> Xiangtan Electric Power Co., Ltd., Xiangtan 411101, China; jiejunliu150@163.com

\* Correspondence: cgy54@sina.cn (G.C.); xinxinzhang@hust.edu.cn (X.Z.)

† All authors contribute equally to this work.

## Supplementary materials and methods

Photographs for TC-stir and TC-ultra were obtained using a digital camera. The surface and cross sectional morphologies of TC-stir and TC-ultra were observed using a field emission scanning electron microscope (SEM, FEI Nova 450, FEI, Hillsboro, OR, USA) with the application of electron probe X-ray micro-analyzer (EPMA, Shimadzu 8050G, Rigaku, Tokyo, Japan) to detect the elemental compositions.

The phase component of MAO specimens was detected by TF-XRD (Thin film X-ray diffraction, XtaLAB PRO MM007HF, Rigaku, Tokyo, ) at a scanning speed of 1° min<sup>-1</sup> with an incident angle of 0.8 °. Water contact angles (CAs) of both coatings were measured using an optical contact angle instrument (JC2000D, Powereach, Shanghai, China).

Electrochemical measurement was conducted in a 3.5 wt. % NaCl solution with a traditional three-electrode configuration. During the electrochemical measurement, the temperature was maintained at ambient temperature. All coatings were sealed by epoxy resin to ensure only 1 cm<sup>2</sup> surface area exposed to the testing solution. Electrochemical impedance spectrum (EIS) was obtained by the same configuration, with the frequency ranging from 0.01 to 10<sup>5</sup> Hz. And electrochemical polarization was conducted after the stabilization of open circuit potential (OCP), which scanned from -200 mV (vs. OCP) to +200 mV (vs. OCP) at the rate of 0.5 mV/s.

The SRB seed was isolated from Shengli Oilfield (Shandong province, China), which was identified as *Desulfotomaculum nigrificans*. The SRB was cultivated in the culture medium containing 0.01 g/L K<sub>2</sub>HPO<sub>4</sub>, 0.2 g/L MgSO<sub>4</sub>, 0.2 g/L (NH<sub>4</sub>)<sub>2</sub>Fe(SO<sub>4</sub>)<sub>2</sub>, 10 g/L NaCl, 1 g/L yeast extract, 0.1 g/L vitamin C, 4 g/L sodium lactate with its pH adjusted to 7.0-7.2 using NaOH. The culture medium was sterilized in an autoclave for 20 min at 121 °C and the specimens were sanitized under a 30 W ultraviolet light bulb for 30 min. To remove dissolved oxygen, the culture medium was then sparged with CO<sub>2</sub> for 4 hours. The incubation of SRB was conducted at 37 °C for 14 days. Afterwards, all the specimens were gently rinsed using phosphate buffer solution (PBS, macklin, city, China), which were then placed in a 2.5% (v/v) glutaraldehyde for 8 hours and then dehydrated using a series of ethanol solutions (20%, 50%, 70%, 90%, 99% by volume) before the examination using SEM.

**Citation:** Hu, P.; Zhu, L.; Liu, J.; Lv, Y.; Cai, G.; Zhang, X. Effect of Ultrasonic Vibration on Microstructure and Antifouling Capability of Cu-Modified TiO<sub>2</sub> Coating Produced by Micro-Arc Oxidation. *Coatings* **2024**, *14*, 376. <https://doi.org/10.3390/10.3390/coatings14040376>

Received: 29 February 2024

Revised: 18 March 2024

Accepted: 21 March 2024

Published: 22 March 2024

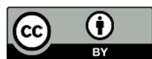

**Copyright:** © 2024 by the authors. Submitted for possible open access publication under the terms and conditions of the Creative Commons Attribution (CC BY) license (<https://creativecommons.org/licenses/by/4.0/>).

## Supplementary result

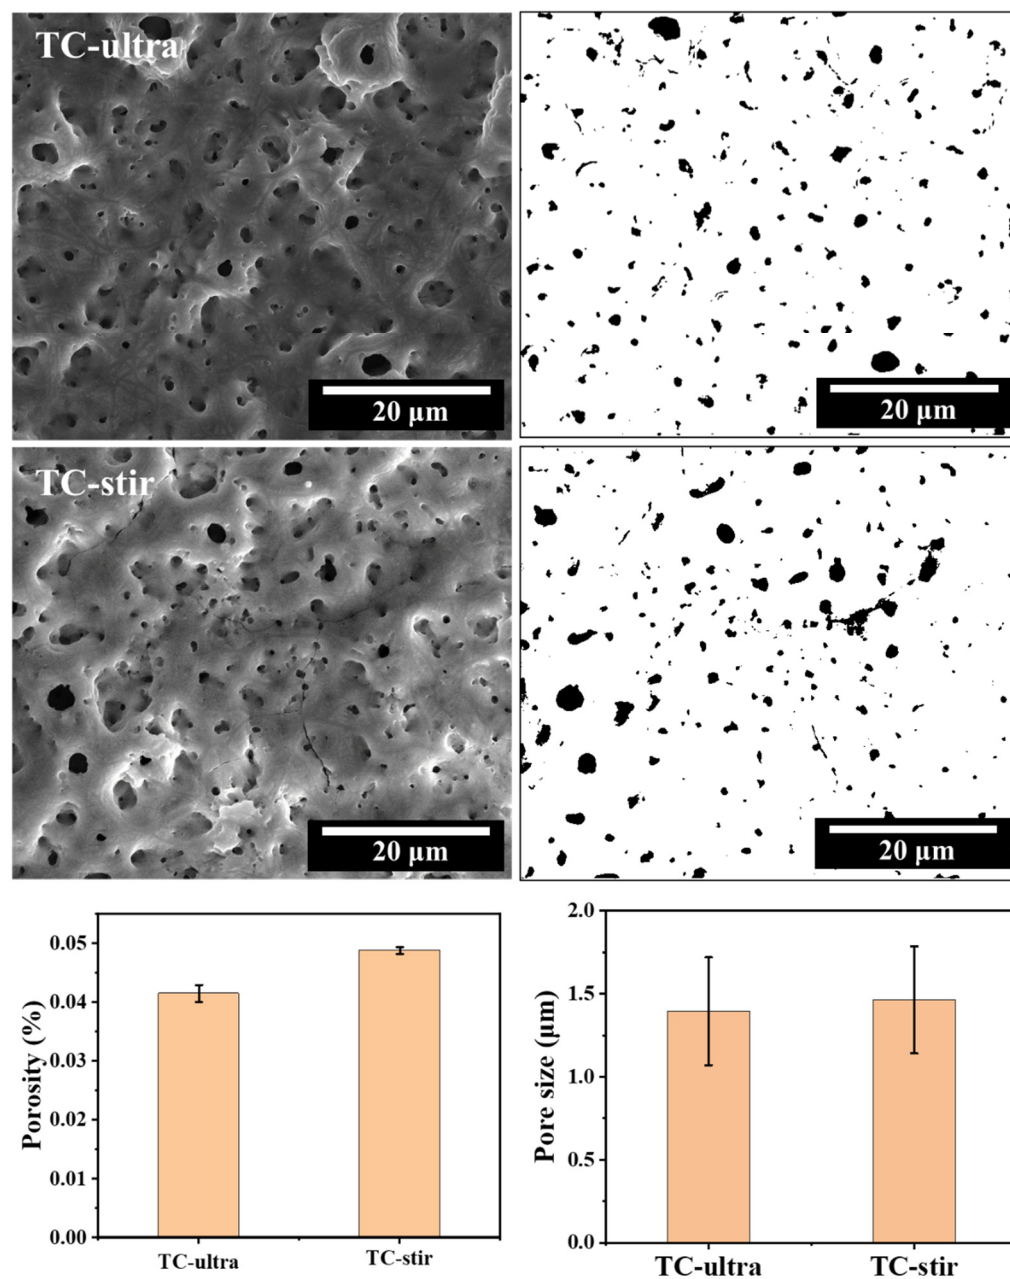

Figure S1. Porosity analysis of both Cu-modified  $\text{TiO}_2$  coatings.
