# Supplementary material for: Effect of Ultrasonic Vibration on Microstructure and Antifouling Capability of Cu-Modified TiO2 Coating Produced by Micro-Arc Oxidation
Source: MDPI journal article supplement (doi:10.3390/coatings14040376), 2024-03-22
Supplement: s1 [file s1]

Archive with 1 entries (1 files):
- coatings-2917254-supplementary.pdf
